# Supplementary material for: A bioinformatic analysis identifies circadian expression of splicing factors and time-dependent alternative splicing events in the HD-MY-Z cell line
Source: PubMed Central journal article supplement (PMC6667479; doi:10.1038/s41598-019-47343-w), 2019-07-30

## Supplementary Information

### **A bioinformatics analysis identifies circadian expression of splicing factors and time-dependent alternative splicing events in the HD-MY-Z cell line**

Nikolai Genov<sup>1,2</sup>, Alireza Basti<sup>1,2</sup>, Mónica Abreu<sup>1,2</sup>, Rosario Astaburuaga<sup>1,2</sup>, Angela Relógio<sup>1,2,\*</sup>

<sup>1</sup>Charité - Universitätsmedizin Berlin, corporate member of Freie Universität Berlin, Humboldt - Universität zu Berlin, and Berlin Institute of Health, Institute for Theoretical Biology, Germany

<sup>2</sup>Charité - Universitätsmedizin Berlin, corporate member of Freie Universität Berlin, Humboldt - Universität zu Berlin, and Berlin Institute of Health, Medical Department of Hematology, Oncology, and Tumor Immunology, Molecular Cancer Research Center, Germany

\*Corresponding author: [angela.relogio@charite.de](mailto:angela.relogio@charite.de)

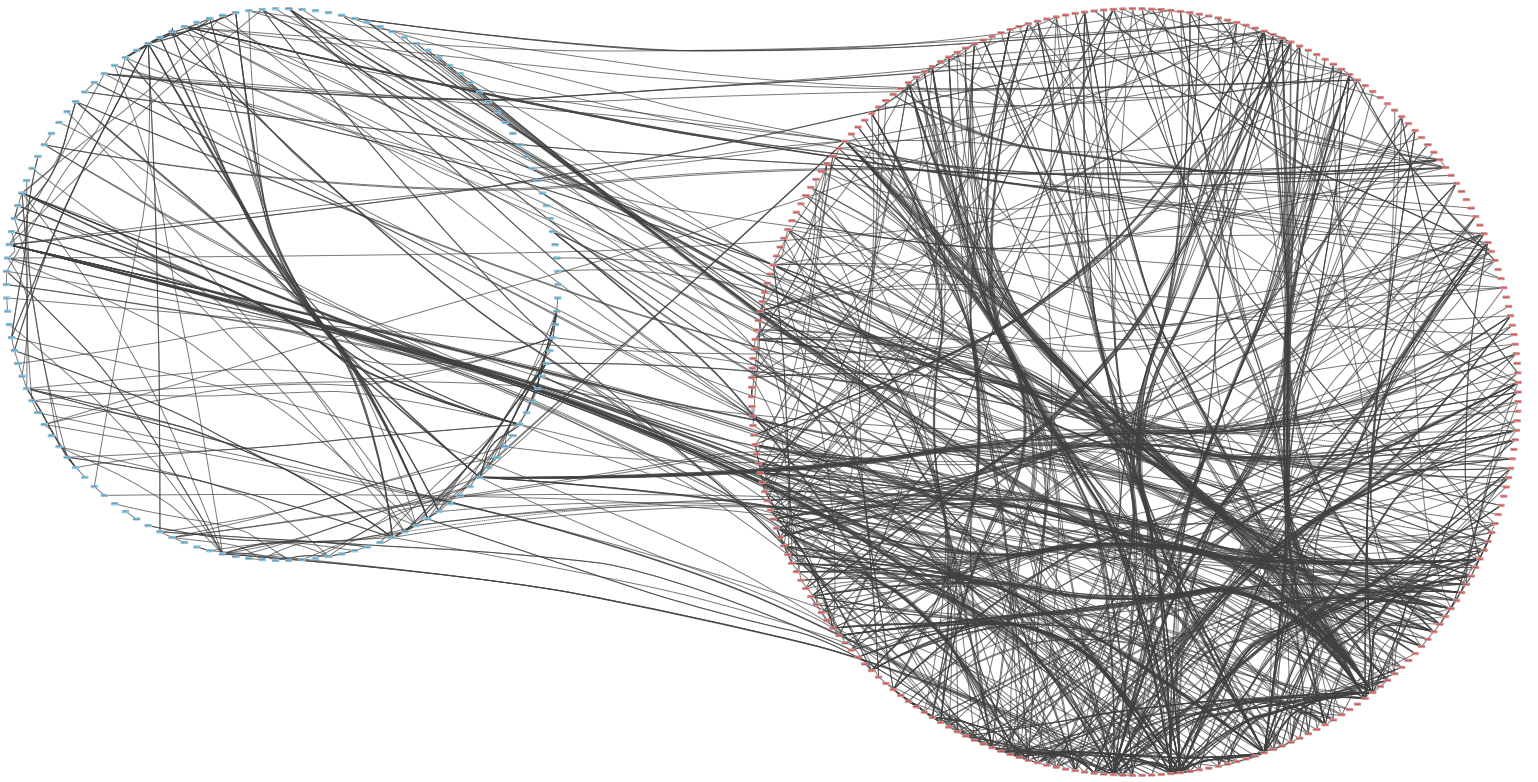

Supplement: 41598_2019_47343_MOESM3_ESM.pdf [file 41598_2019_47343_MOESM3_ESM.pdf]
